# Supplementary material for: Neonatal adiposity is associated with microRNAs in adipocyte-derived extracellular vesicles in maternal and cord blood
Source: Research Square preprint supplement (doi:10.21203/rs.3.rs-2480256/v1), 2023-01-31
Supplement: Supplementary file [file c0a9899e096367bf3110b509.pdf]

Supplementary figure 3. Comparison of average z-score of miRNA expression profile in maternal and cord blood samples between lean Vs adipose groups

**A**

Mothers

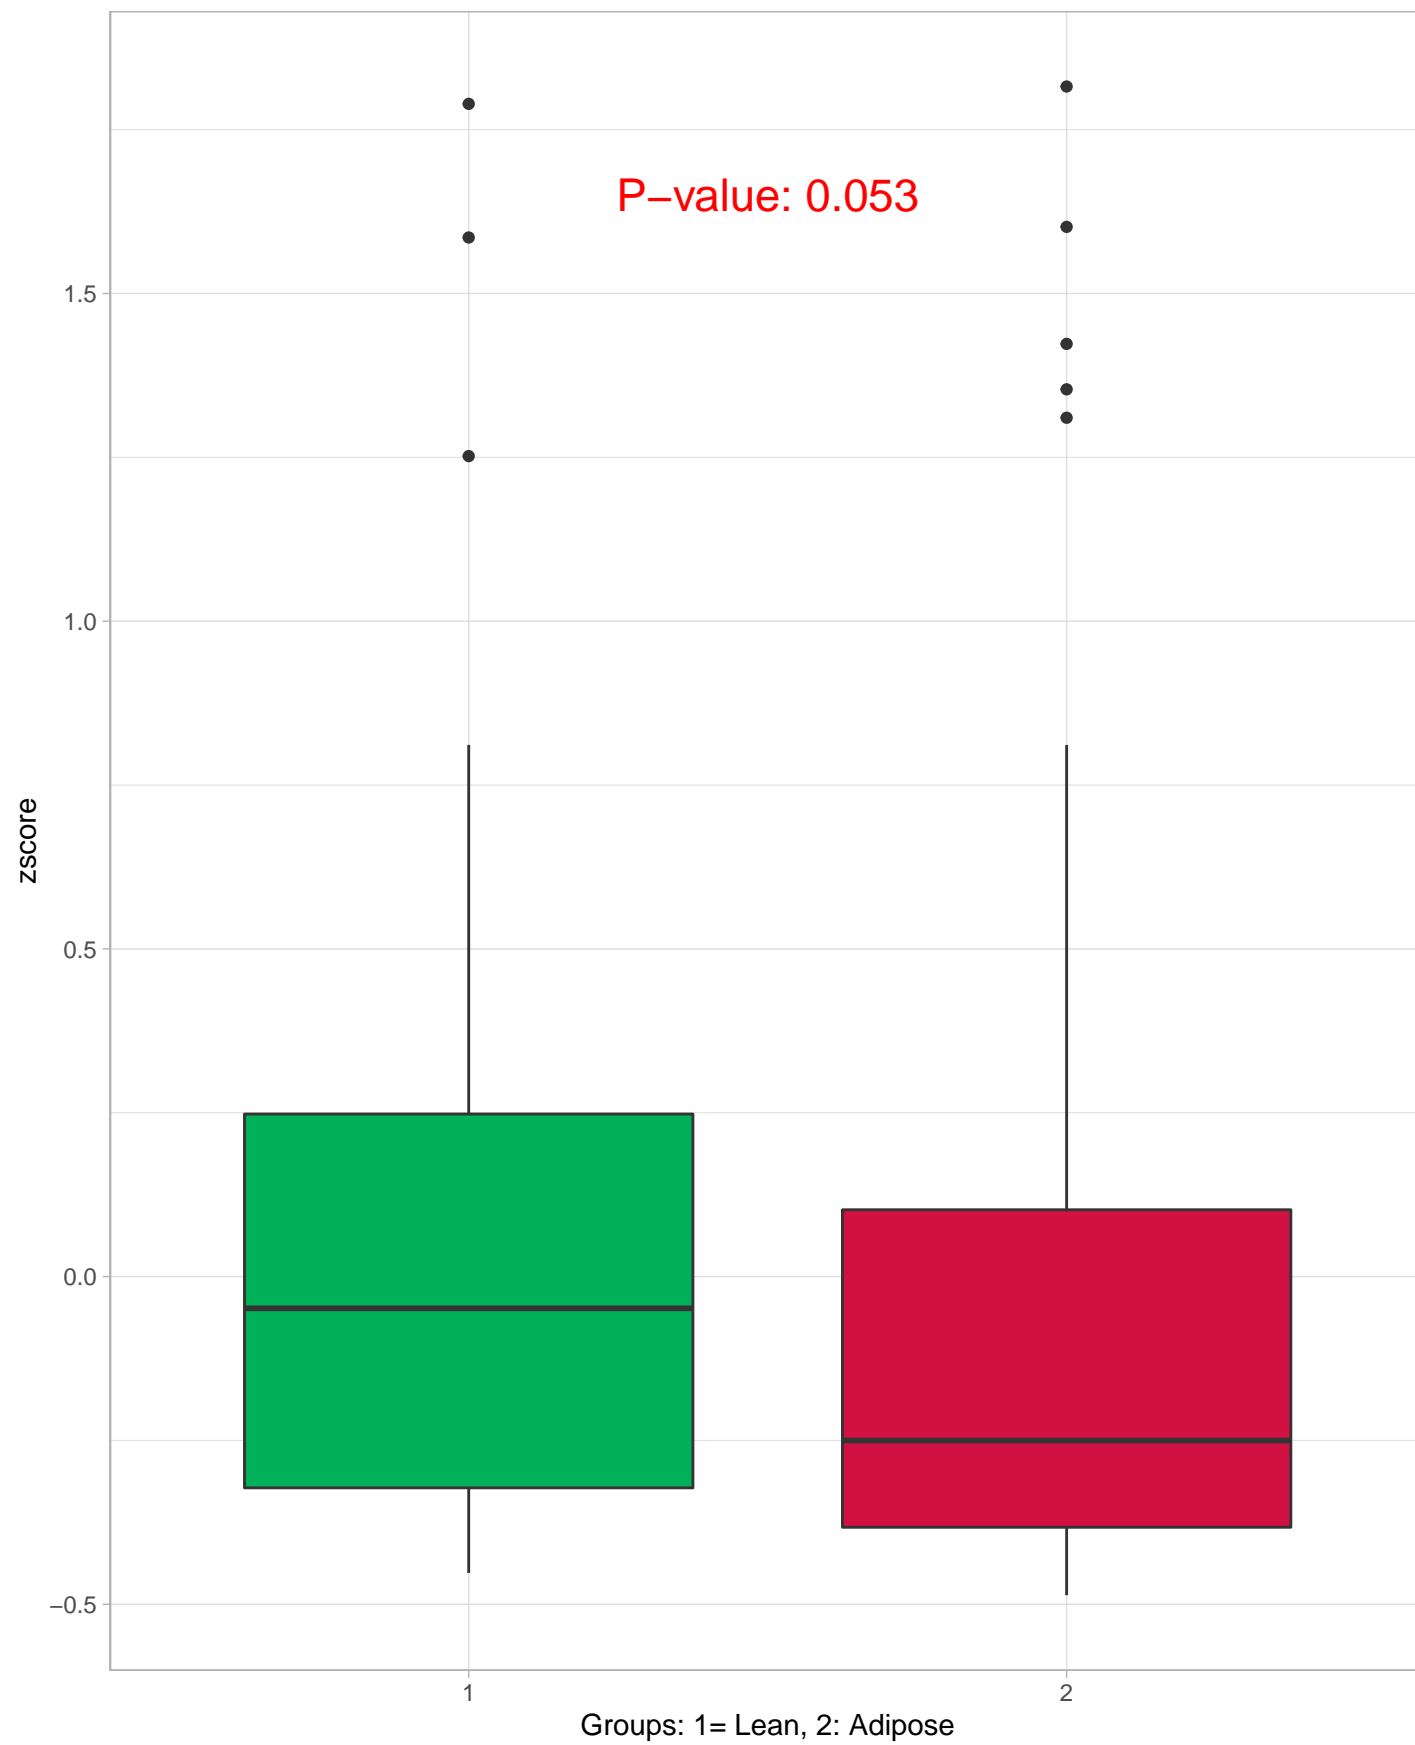

**B**

Cord blood

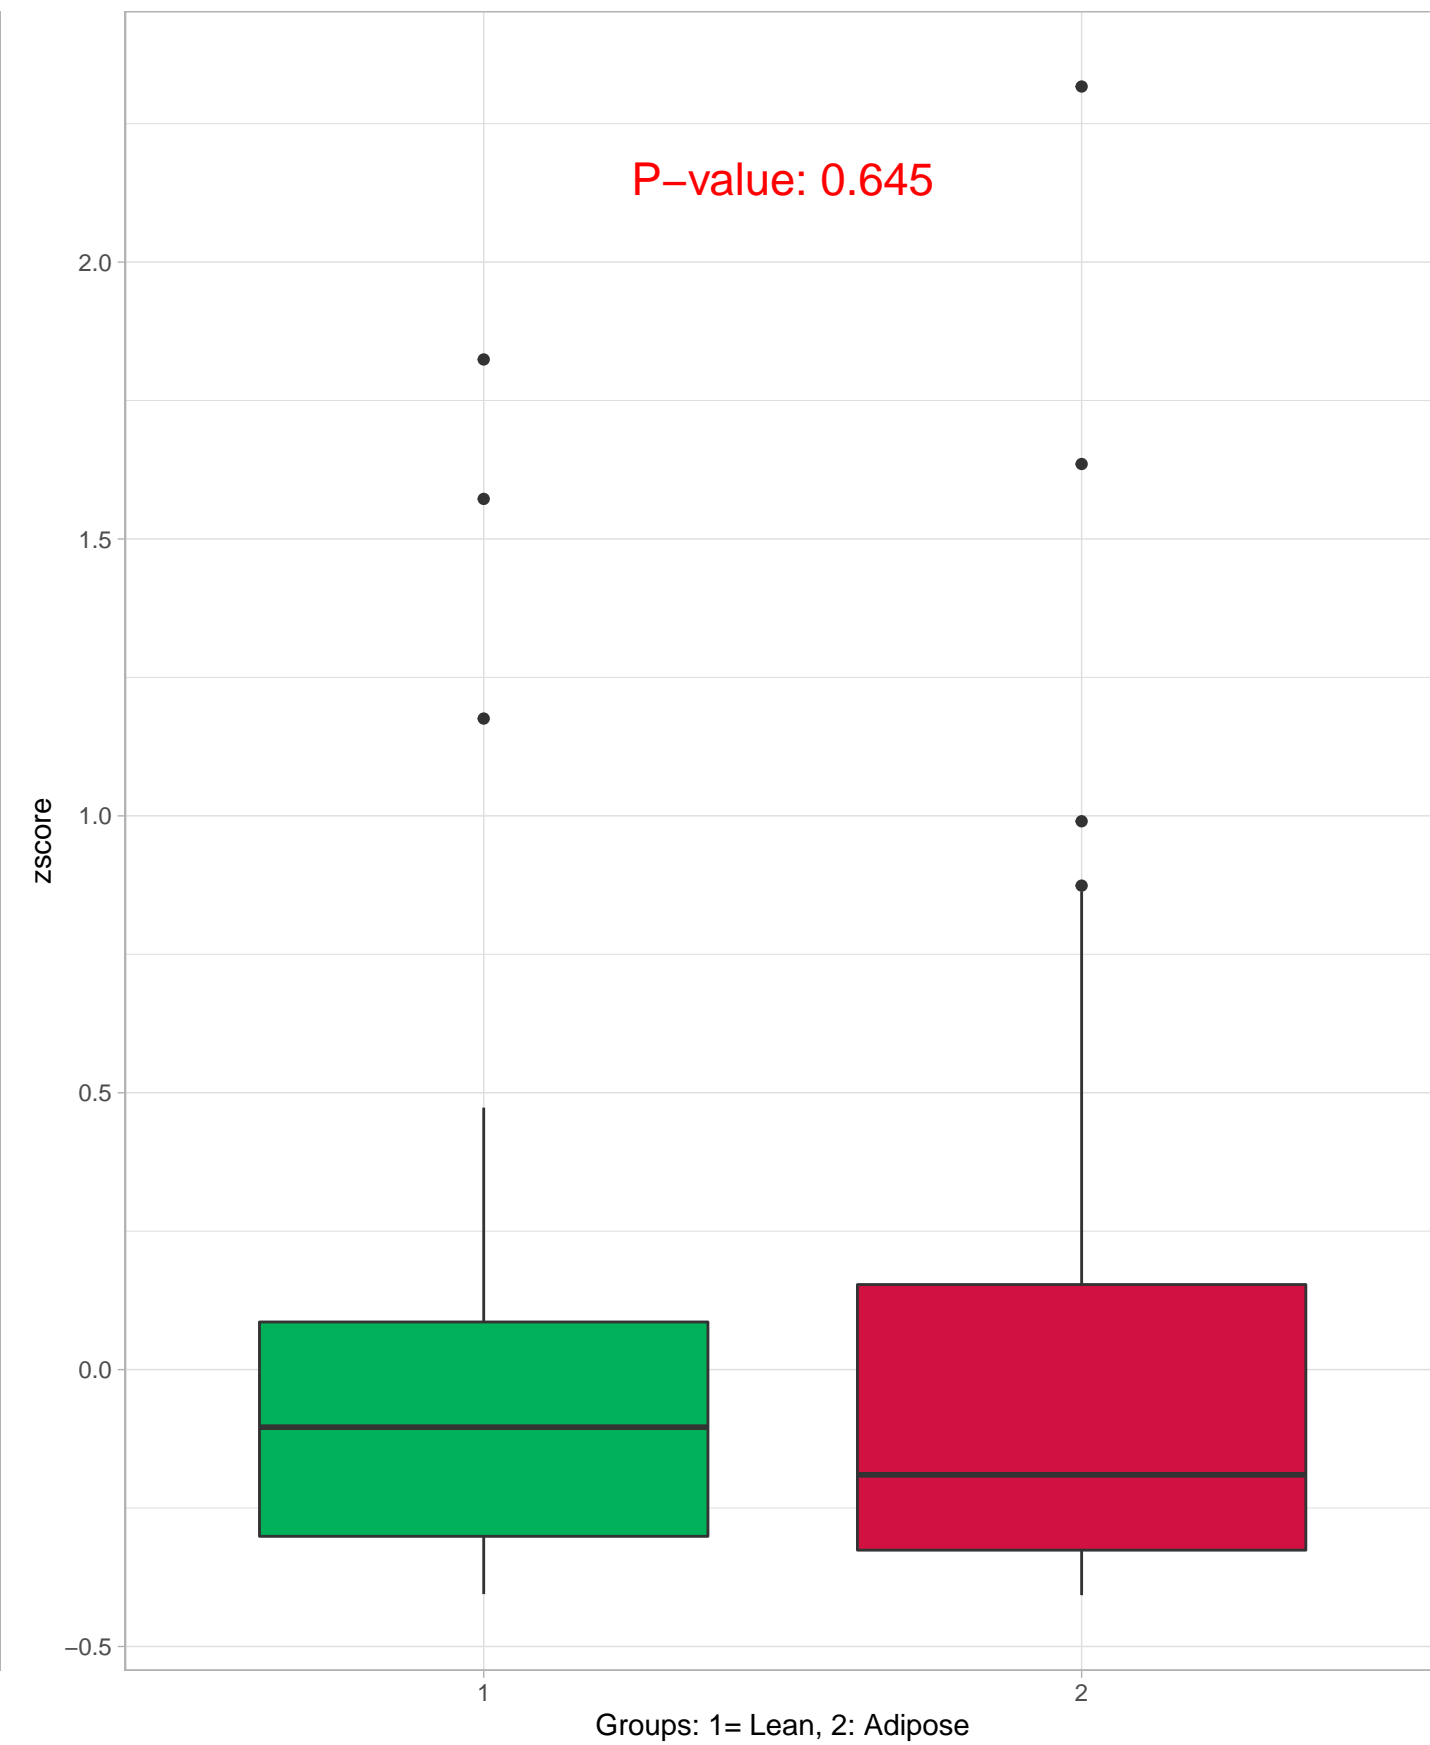

Group  Lean  Adipose
