# Supplementary material for: Neonatal adiposity is associated with microRNAs in adipocyte-derived extracellular vesicles in maternal and cord blood
Source: Research Square preprint supplement (doi:10.21203/rs.3.rs-2480256/v1), 2023-01-31

**Supplementary figure 1: STROBE flow diagram for the selection of participants**

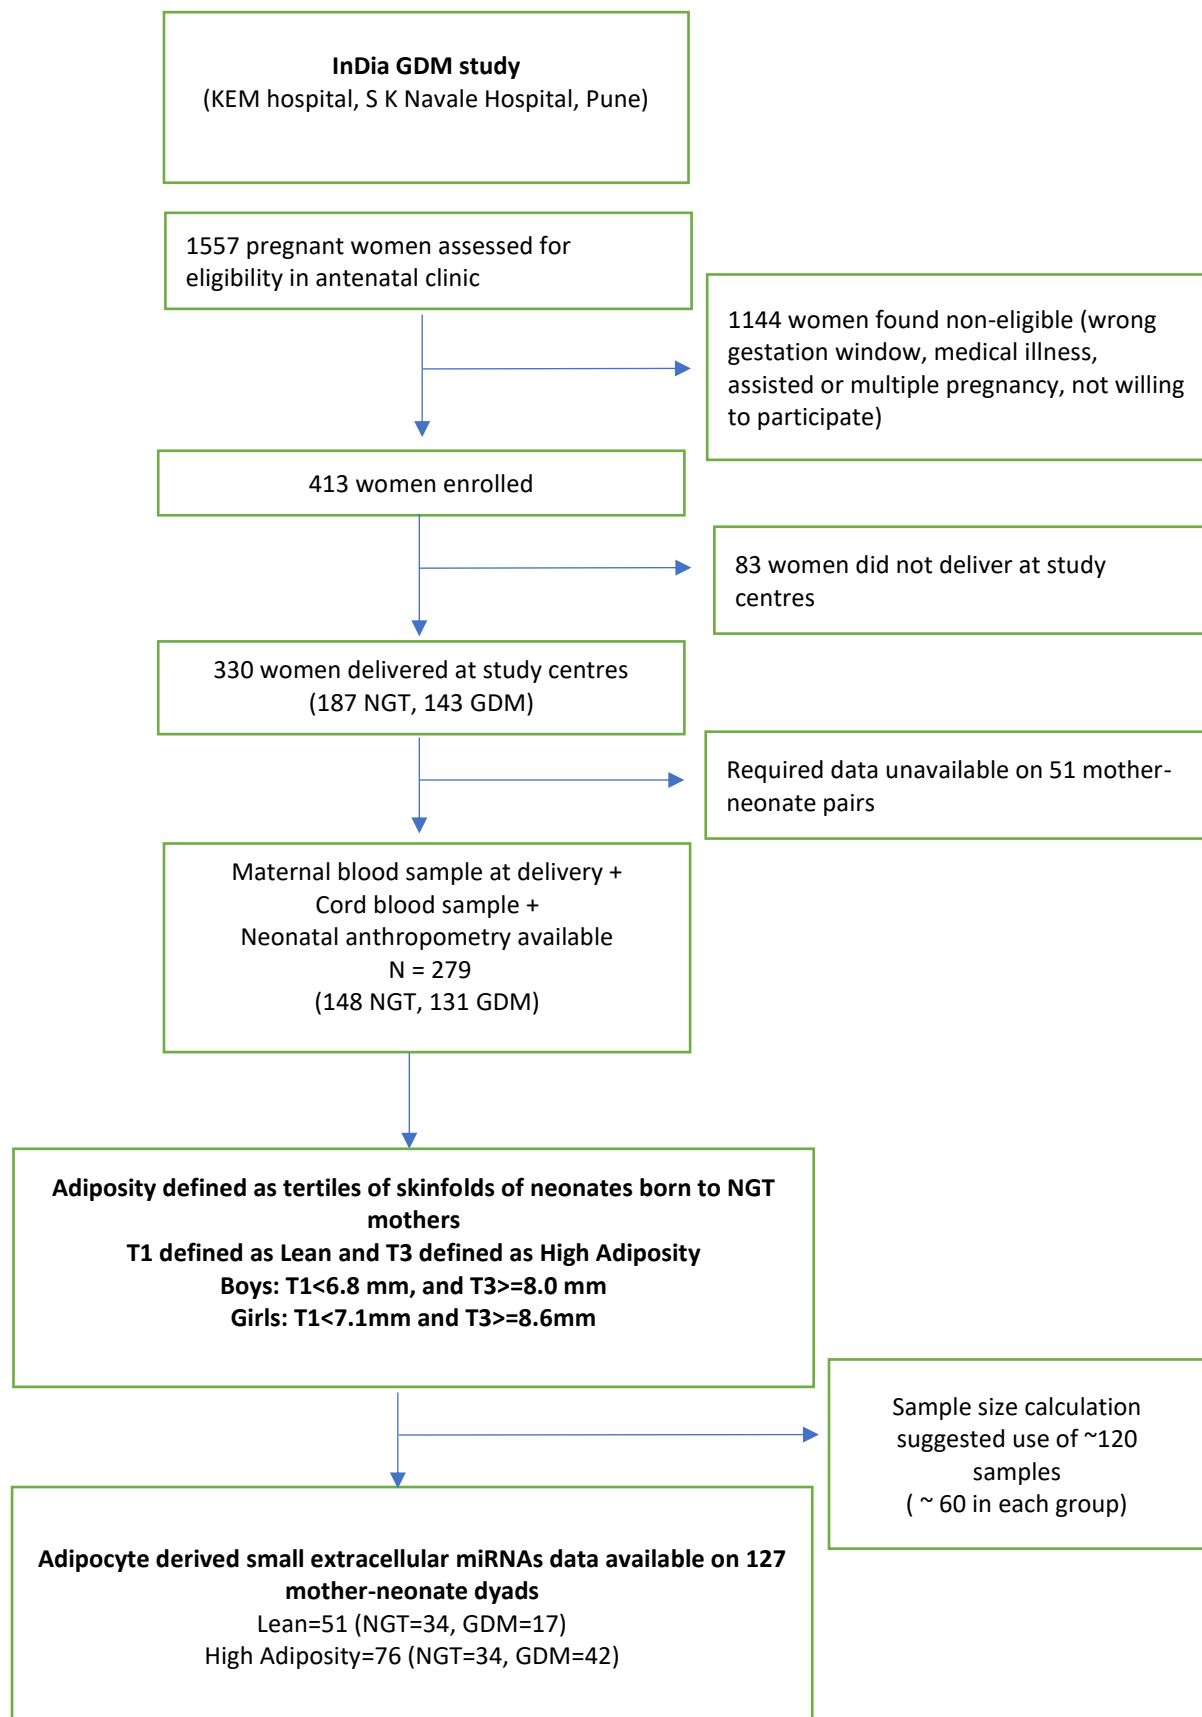

Supplement: Supplementary file [file c07ac8202014883a6b185f41.pdf]
