# Supplementary figures and images for: Neonatal adiposity is associated with microRNAs in adipocyte-derived extracellular vesicles in maternal and cord blood
Source: Research Square preprint supplement (doi:10.21203/rs.3.rs-2480256/v1), 2023-01-31

**Supplementary figure 2: STROBE Flow diagram for miRNA analysis**

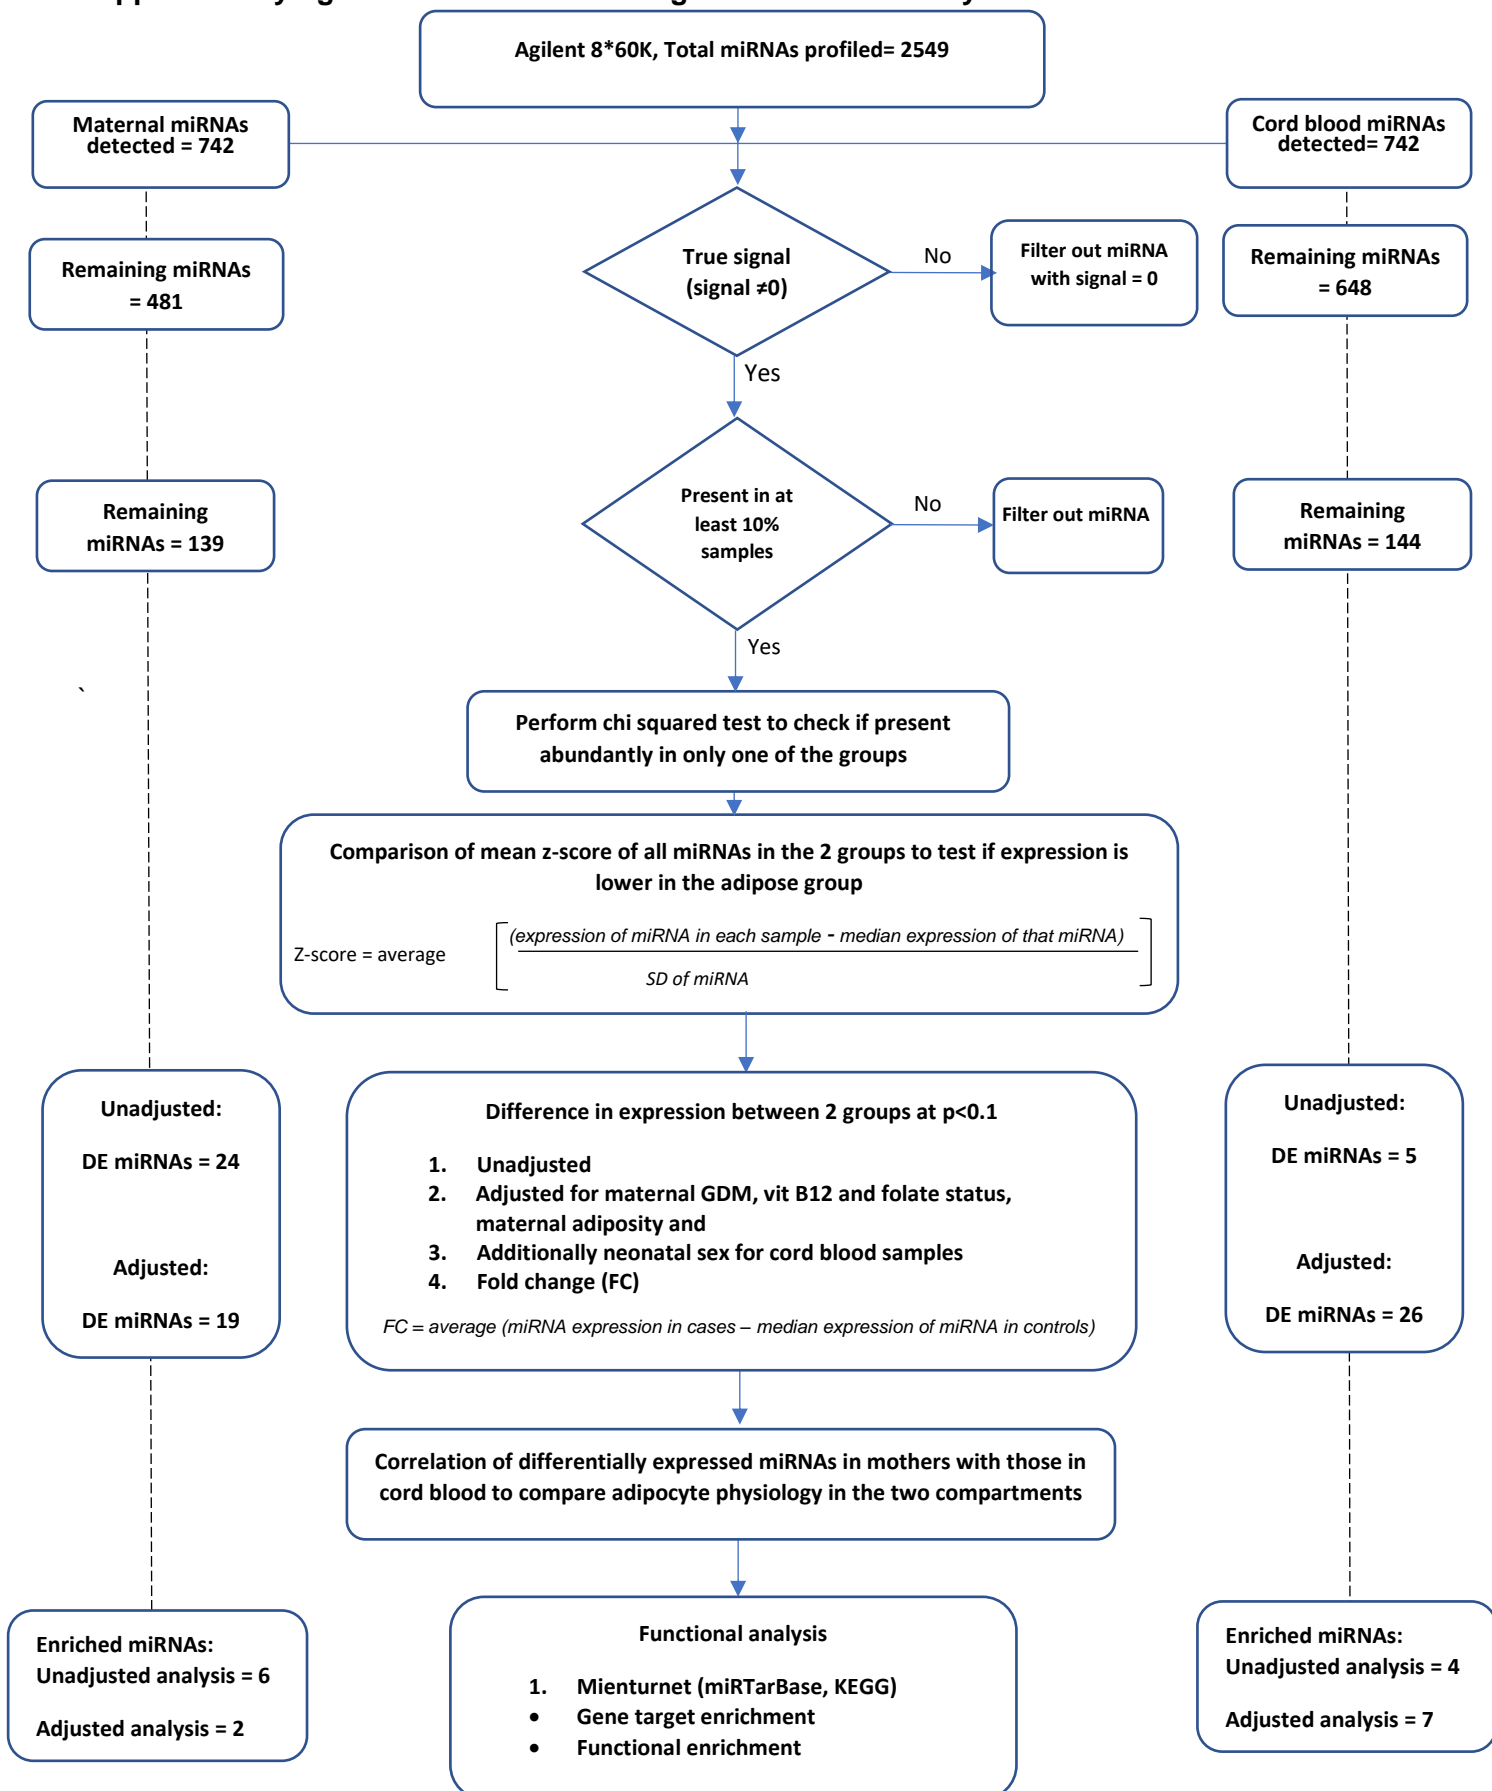

Supplement: Supplementary file 1 [file 8544fda3de5ee63b1240bc0a.pdf]
